# Supplementary material
Source: PubMed Central journal article supplement (PMC7616910)
Supplement: EMS83279-supplement-1.pdf [file EMS83279-supplement-1.pdf]

## 1 **Supplementary Methods**

2           **3D Face Database.** The face database comprised 197 females, 158 males,  
3 233 Western Caucasian, 122 East Asian, age between 16 and 86, SD = 15.06,  
4 scanned in-house with a Di4D face capture system, at a high resolution in shape  
5 (4,735 3D vertex coordinates) and texture (800\*600 RGB pixels, see Supplementary  
6 Figure 1A). All 3D models were in full color with hair removed, posing with a neutral  
7 facial expression.

8           **Fine-tuning Beta\_2 Coefficients.** In a self-adaptive procedure, we initialized  
9 Beta\_2 amplification with equally spaced values between 0 and 50, with 10 unit  
10 increments. We then narrowed the amplification range to participant's responses until  
11 convergence, keeping the same total number of stimuli (i.e. 6 faces) per trial.  
12 Supplementary Figure 2B2 illustrates the adaptive procedure.

13           The experiment comprised one session per familiar face, with familiar face  
14 order randomized across participants. Each session started with the screen  
15 presentation of the front view of one familiar face target to instruct participants as to  
16 the target of the session. On each trial, 6 faces initially amplified between 0 and 50  
17 appeared on the screen, randomly positioned in a 2 by 3 array against a black  
18 background. We instructed participants to choose the face that best resembled the  
19 familiar identity by pressing one of six response buttons. The 6 faces remained on  
20 the screen until response, immediately followed by the next trial. We repeated the  
21 trial 5 times, with the same 6 faces in different random array positions, to determine  
22 the next amplification range. We narrowed the amplification range every 5 trials by  
23 finding the minimum and maximum values that bound the participant's 5 choices.  
24 With this new range, we produced 6 new faces by evenly sampling the amplification  
25 values and again tested the participant over 5 new trials. We iteratively repeated  
26 sequences of 5 testing trials, updates of the amplification range, until it stabilized—i.e.  
27 remained constant over three blocks of 5 trials. We used the median of the final  
28 amplification range as value to generate the fine-tuned Beta\_2 coefficients that we  
29 call *mental representation* in our analyses (see Supplementary Figure 2B2).

30           **Non-negative Matrix Factorization (NNMF).** We applied NNMF to the full  
31 4735 by 56 (i.e. vertex-by-model) binary faithful representation matrix to identify the  
32 main face shape features that represent faithful memory representations of identities  
33 across all participants. NNMF factorizes the multi-dimensional (and positive) data into  
34 non-negative additive components by minimizing the reconstruction error. We  
35 performed NNMF with an alternating-least square algorithm and repeated the  
36 factorization using 1 to 20 components. We determined N, the optimal number of  
37 components, by repeating 1,000 times NNMF for each number of components,  
38 randomizing initial conditions and recalculating the mean squared residual  
39 reconstruction error. The boxplots in Supplementary Figure 4A illustrate the curve of  
40 residual errors. Its 2<sup>nd</sup> derivative shows that residual errors flatten when N equals 8

41 components. Supplementary Figure 4B shows the face reconstructions based on  
42 these reduced set of 8 components against the faithful representations of the original  
43 faces (cf. Figure 2B), demonstrating the reliability of our NNMF additive  
44 reconstructions.

45 ***Linear Mixed Effect Model of Face Type by Amplification Interaction.*** We fitted a  
46 linear mixed effects model (i.e. fitlme, Matlab 2016b) to the data by collapsing across  
47 4 identities, using Wilkinson's formulae:

$$\begin{aligned} \text{Performance} \sim & 1 + \text{Face Type} + \text{Amplification} + \text{Face Type} * \text{Amplification} \\ & + (\text{Face Type} + \text{Amplification} + \text{Face Type} * \text{Amplification} \\ & - 1 | \text{Subject}) \end{aligned}$$

48 The model had fixed factors of Face Type (i.e. diagnostic vs. nondiagnostic),  
49 Feature Amplification (i.e. 0.33, 0.67, 1, 1.33, 1.67) and the interaction between Face  
50 Type and Amplification as explanatory variables, and participants' response  
51 variability as random factor. We tested the specified fixed effect factors using ANOVA  
52 in Matlab 2016b, and reported the full statistics in Supplementary Table 7.

53

**A. 3D Face Parameters**

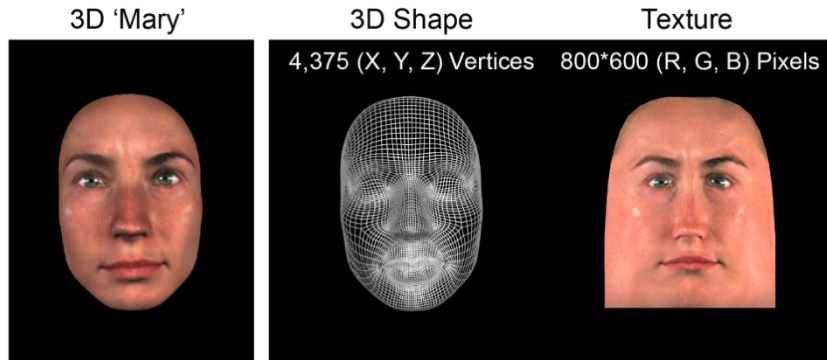

**B. Control of GLM and Identity**

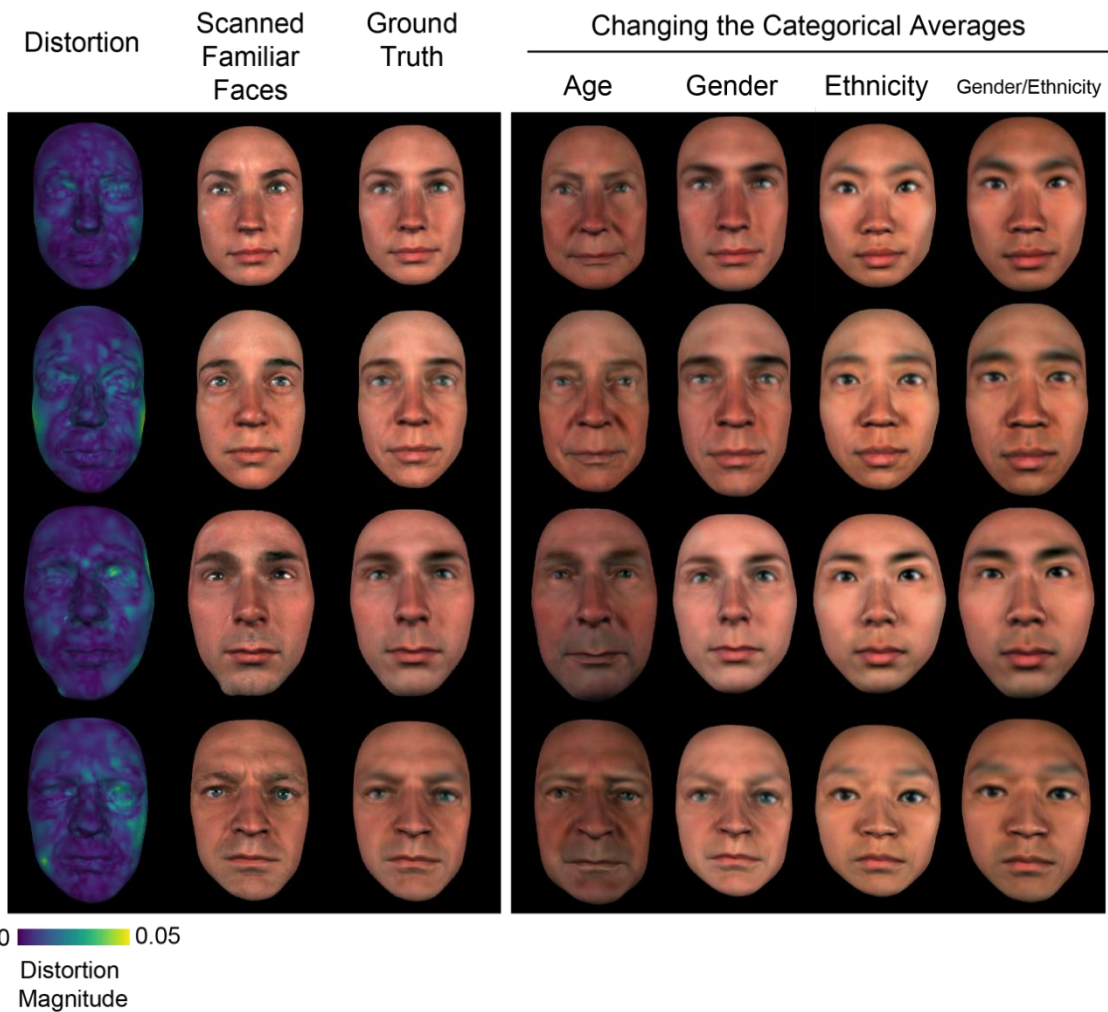

55

56 **Supplementary Figure 1. (A) 3D Face parameters.** We parametrized the shape of a face  
 57 with the 3D coordinates of 4,735 vertices and its texture with 800\*600 RGB 2D pixels. **(B)**  
 58 **GLM control of the categorical averages and identity components.** *Distortion.* Distortion  
 59 quantifies, vertex per vertex the quality of the 3D GLM fit of the scanned familiar faces.  
 60 *Changing the categorical averages.* In each column, the GLM controls the factors of sex,  
 61 ethnicity and age using local averages, while the identity residuals are kept constant.

## A. Estimating BETA\_2 Coefficients (Model →)

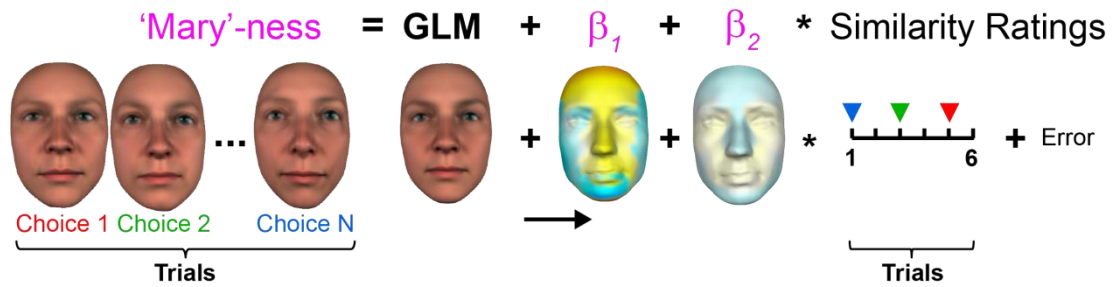

## B. Fine-Tuning BETA\_2 Coefficients

### B.1. Amplifying Beta\_2 Coefficients (Generate ←----)

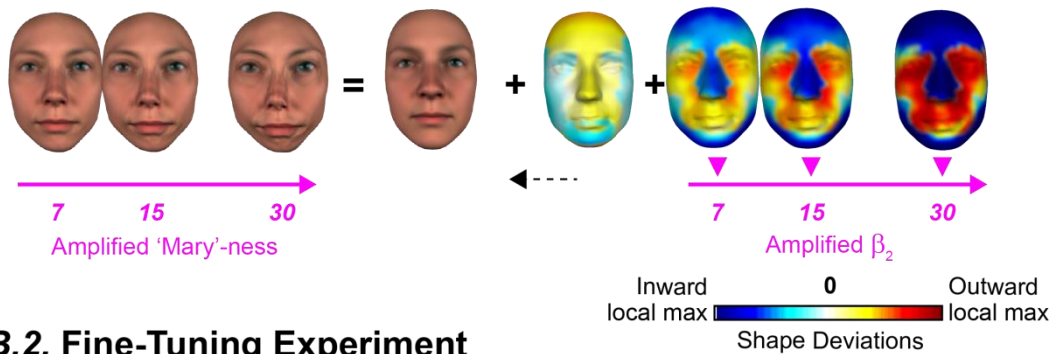

### B.2. Fine-Tuning Experiment

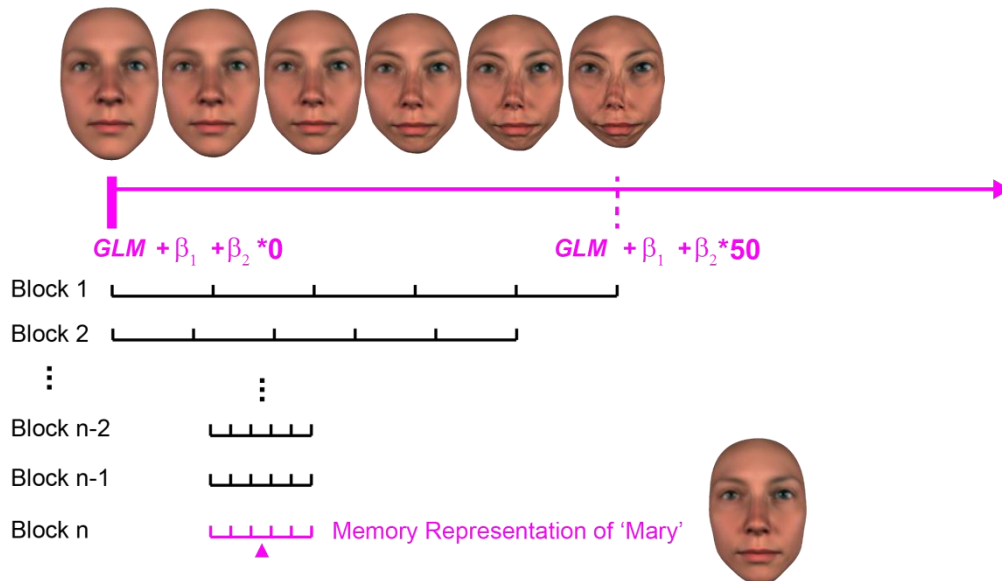

62

63 **Supplementary Figure 2. Reverse-correlating the visual information contents of familiar**

64 **face representations. (A) Estimating Beta\_2 Coefficients.** We linearly regressed the 3D

65 vertices of shape (separately for the X, Y and Z coordinates, texture not illustrated) with

66 similarity judgments of the selected random identities (illustrated here for 'Mary'). For each

67 vertex, Beta\_2 coefficients are color-coded according to their magnitude. Yellow-to-red

68 indicates an outward change from the categorical average; turquoise-to-blue indicates an

69 inward change from the categorical average. (B) Fine-tuning Beta\_2 Coefficients. (B.1)

70 *Amplifying Beta\_2 coefficients.* Illustration of the amplification of Beta\_2 coefficients. (B.2)

71 *Illustration of the fine-tuning experiment.*

A. 'Mary'

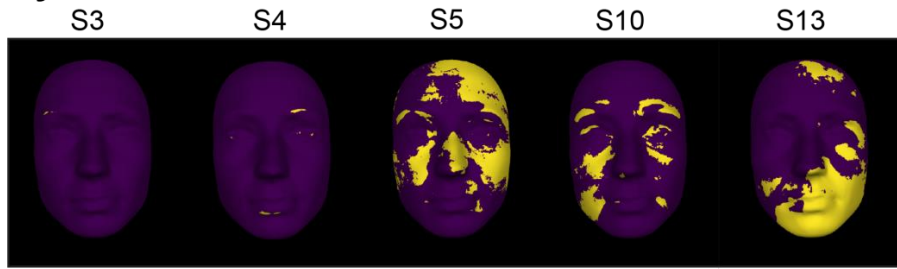

B. 'Stephany'

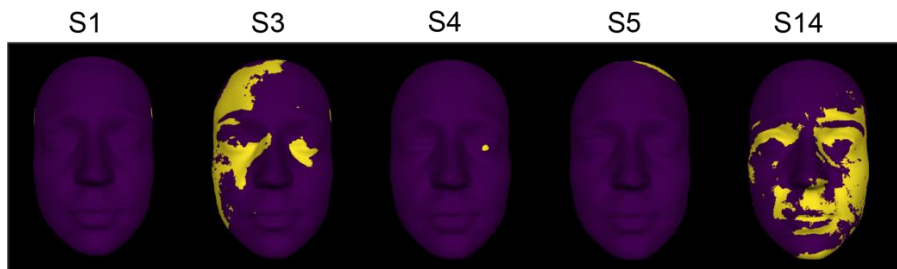

C. 'John'

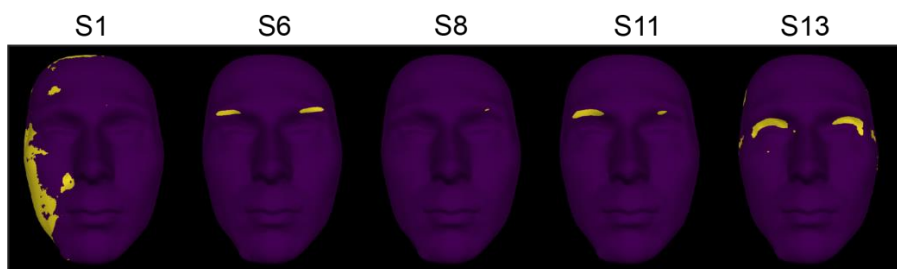

D. 'Peter'

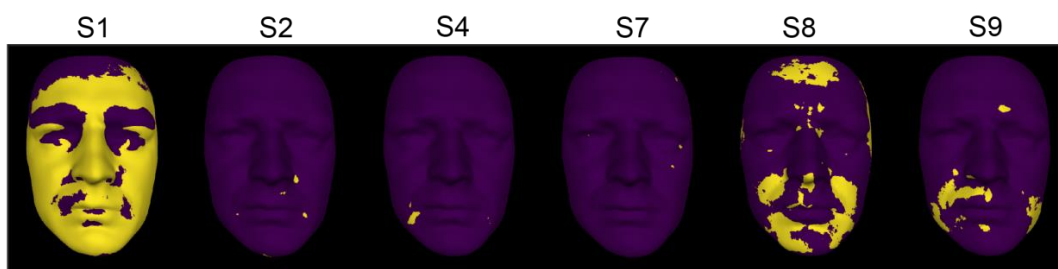

Significant   Chance level

72

73 **Supplementary Figure 3. Beta\_2 coefficients of texture.** Yellow colored overlays on each

74 familiar face illustrate the significant Beta\_2 coefficients for RGB texture pixels in each

75 participant (labelled S1-S14). Dark purple pixels represent non-significant RGB coefficients.

76

### A . NNMF Reconstruction with 8 Additive Components

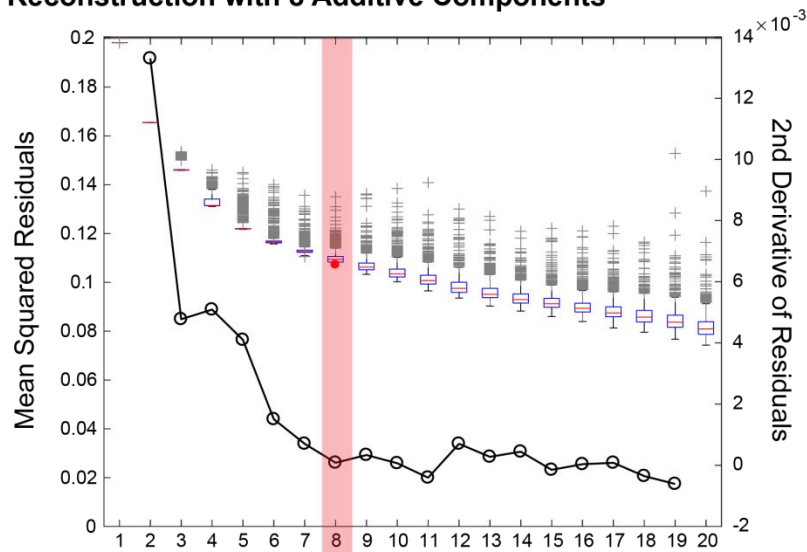

### B . Comparison of Original Faithful Representations vs. NNMF Reconstructions

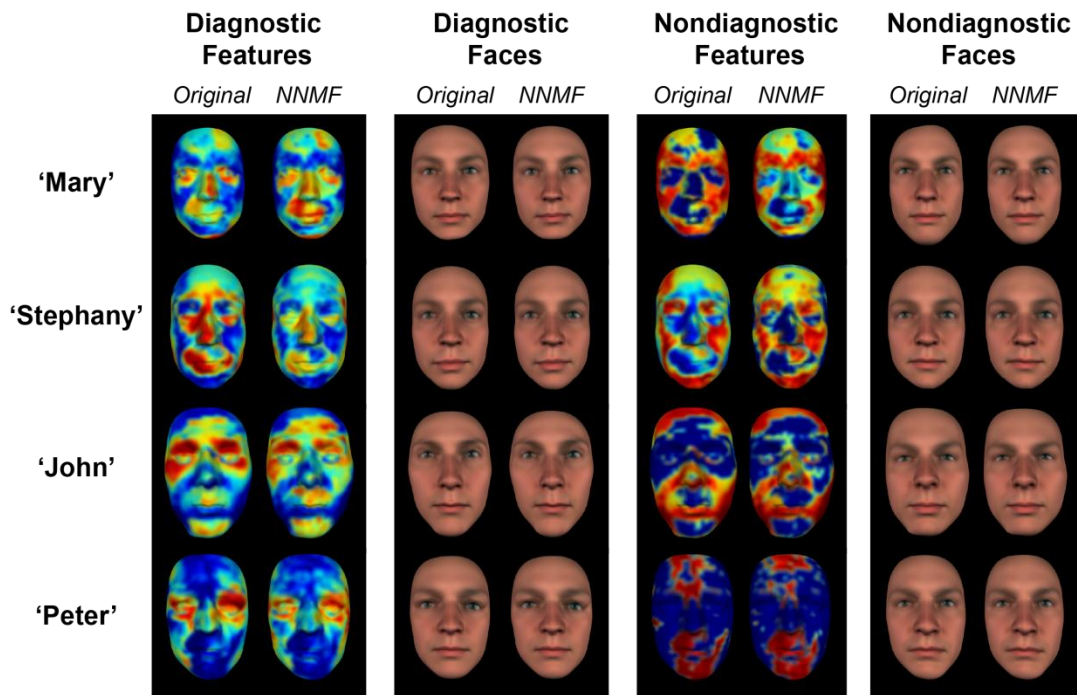

77

78 **Supplementary Figure 4. Accuracy of reduced (i.e. 8 NNMF components)**  
 79 **multivariate representations of faithful face representations. A. NNMF**  
 80 **representation with 8 additive components.** We performed NNMF across all identity  
 81 models and participants to derive a reliable low-dimensional multivariate  
 82 representation of their main shape features. We found that reconstruction error  
 83 plateaued with 8 NNMF components (highlighted in red). **B. Comparison of original**  
 84 **faithful representations vs. NNMF reconstructions.** We compared the reduced NNMF  
 85 representations of each identity with their original faithful representations and, as can

86 be seen both from the reconstructed diagnostic features and faces, the  
87 reconstructions with 8 components were reliable.



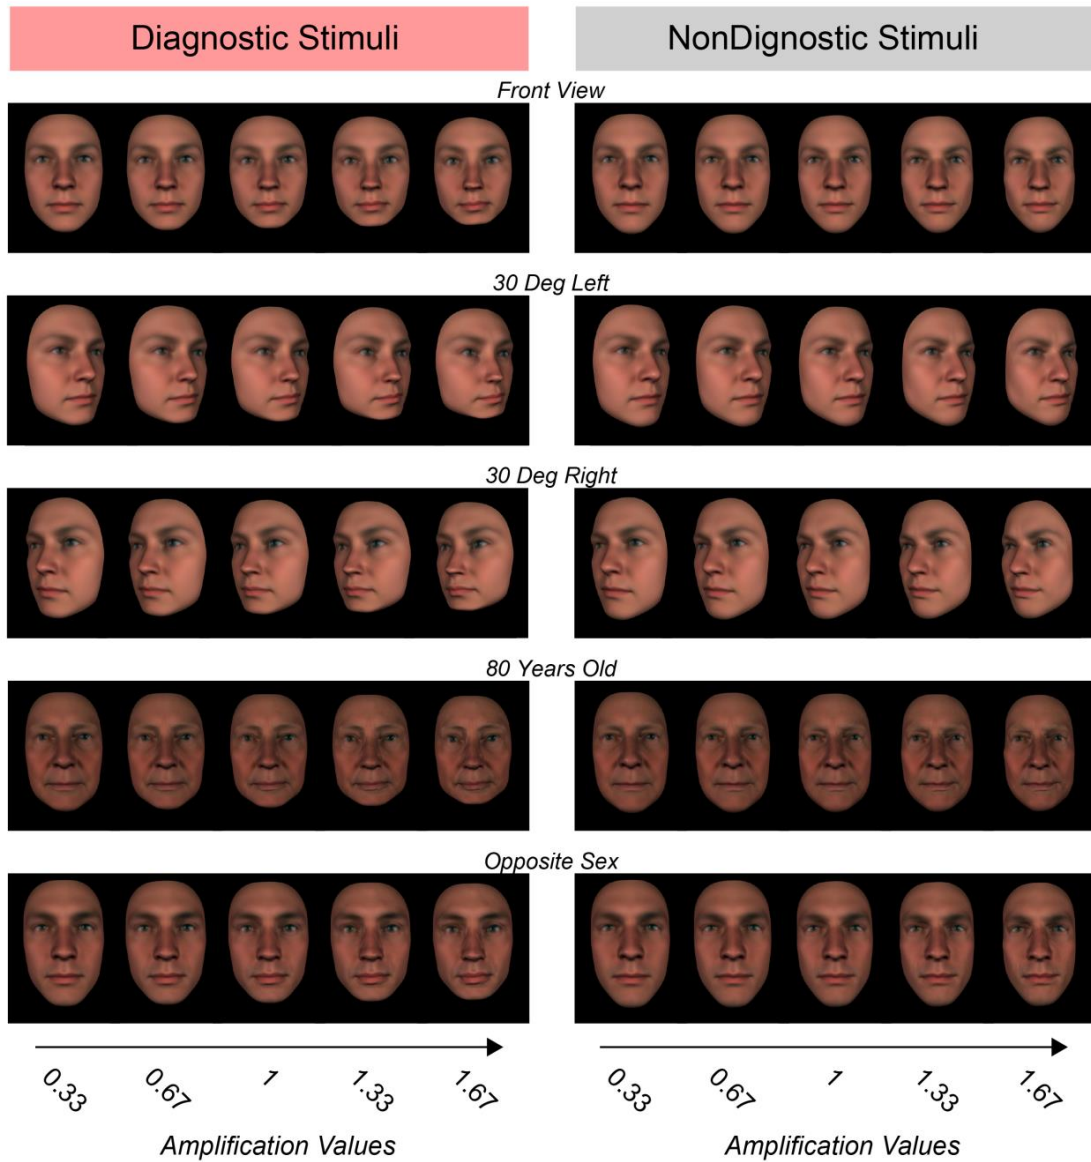

88

89 **Supplementary Figure 5. Diagnostic (left) and nondiagnostic (right) faces of**  
 90 **'Mary'**. Each row presents the main conditions of stimulus synthesis (i.e. 3  
 91 viewpoints, age and sex). Each column presents a level of diagnostic (vs.  
 92 nondiagnostic) component amplification in the face.



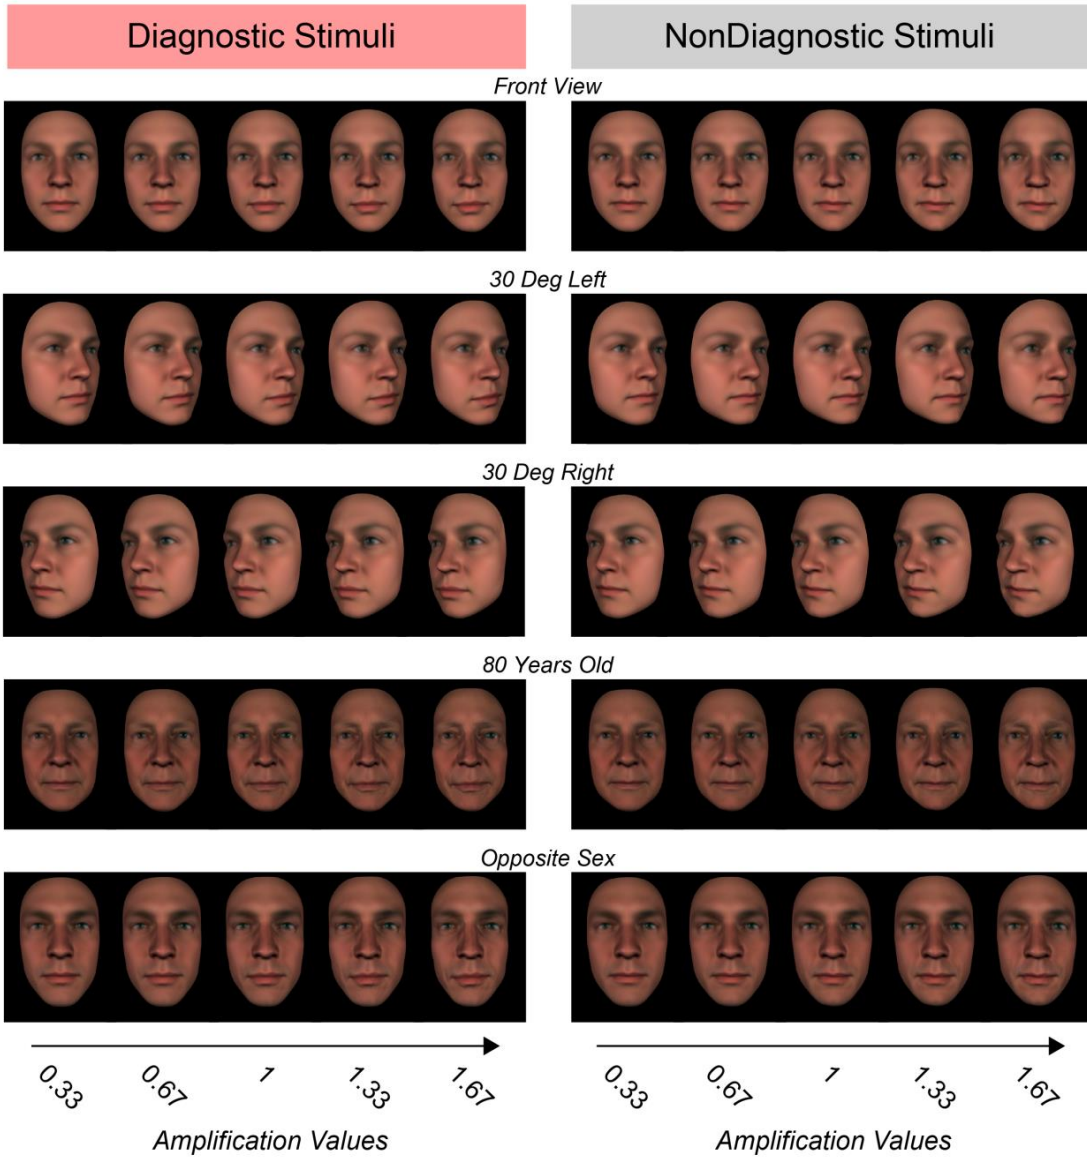

93

94 **Supplementary Figure 6. Diagnostic (left) and nondiagnostic (right) faces of**  
 95 **'Stephany'**. Same caption as in Supplementary Figure 5.

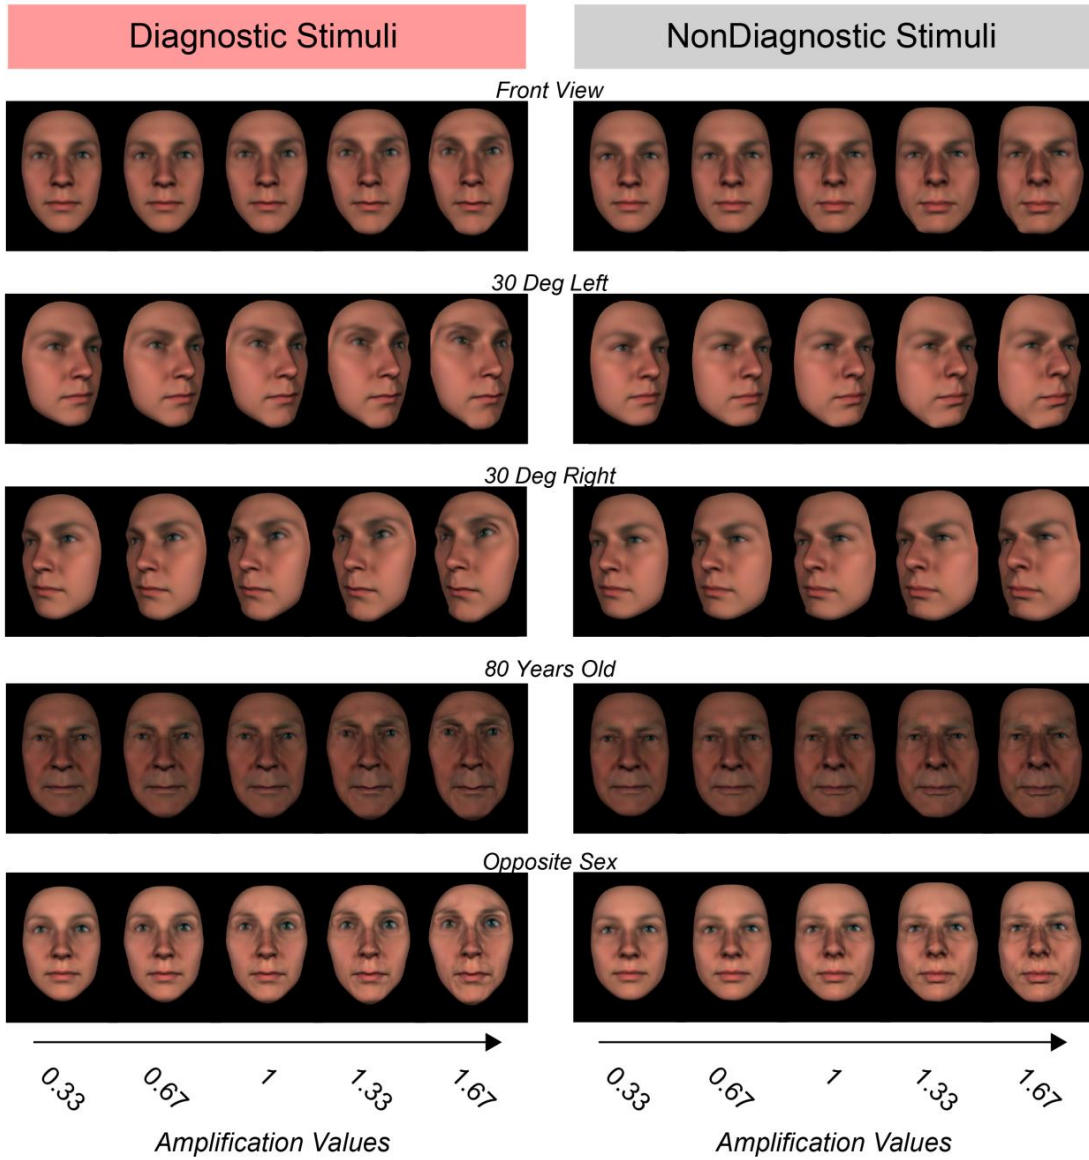

96

97 **Supplementary Figure 7. Diagnostic (left) and nondiagnostic (right) faces of**  
 98 **'John'**. Same caption as in Supplementary Figure 5.

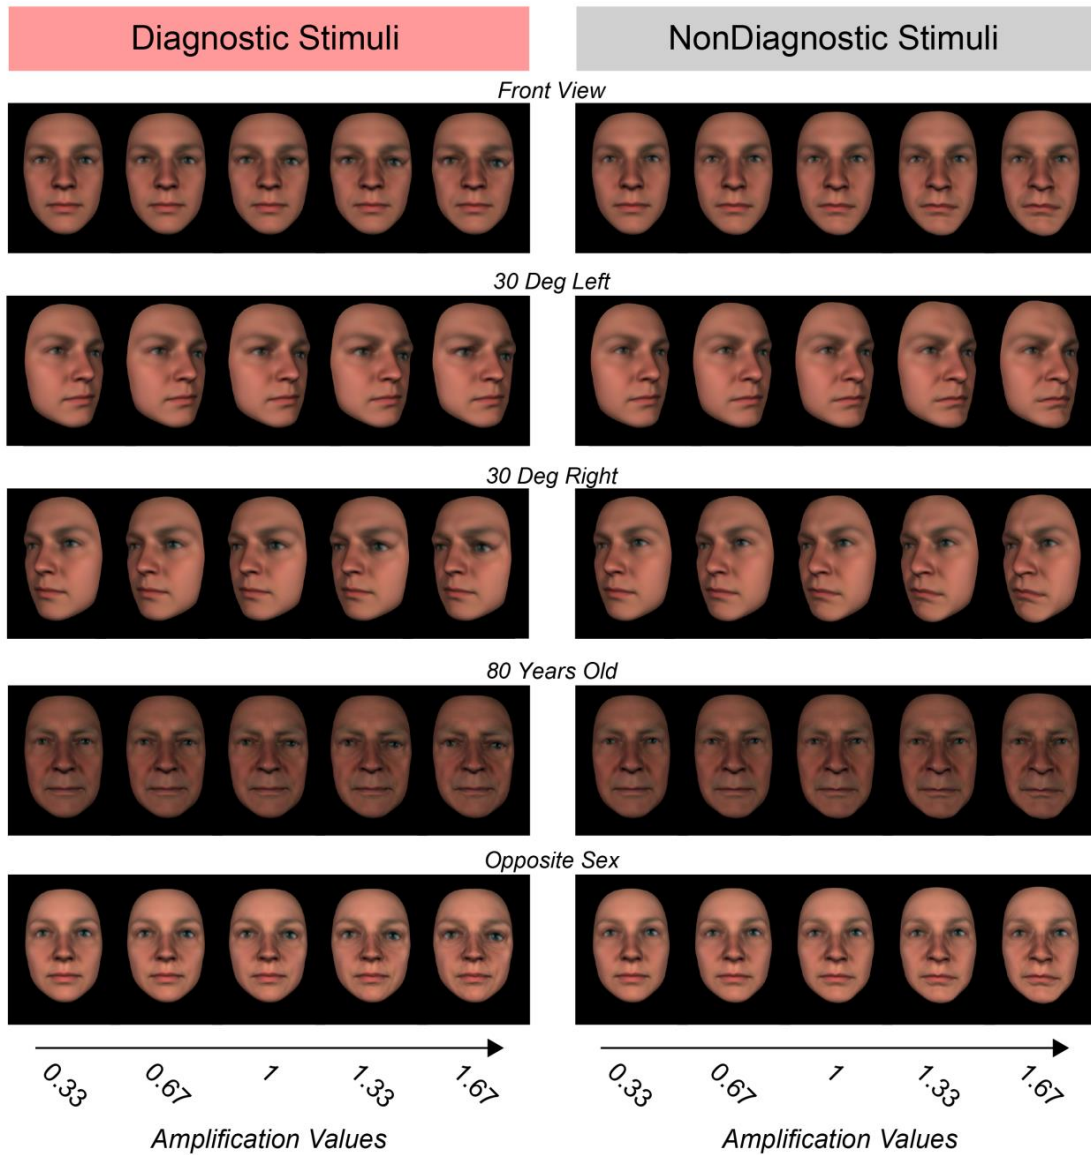

99

100 **Supplementary Figure 8. Diagnostic (left) and nondiagnostic (right) faces of**  
 101 **'Peter'**. Same caption as in Supplementary Figure 5.

102

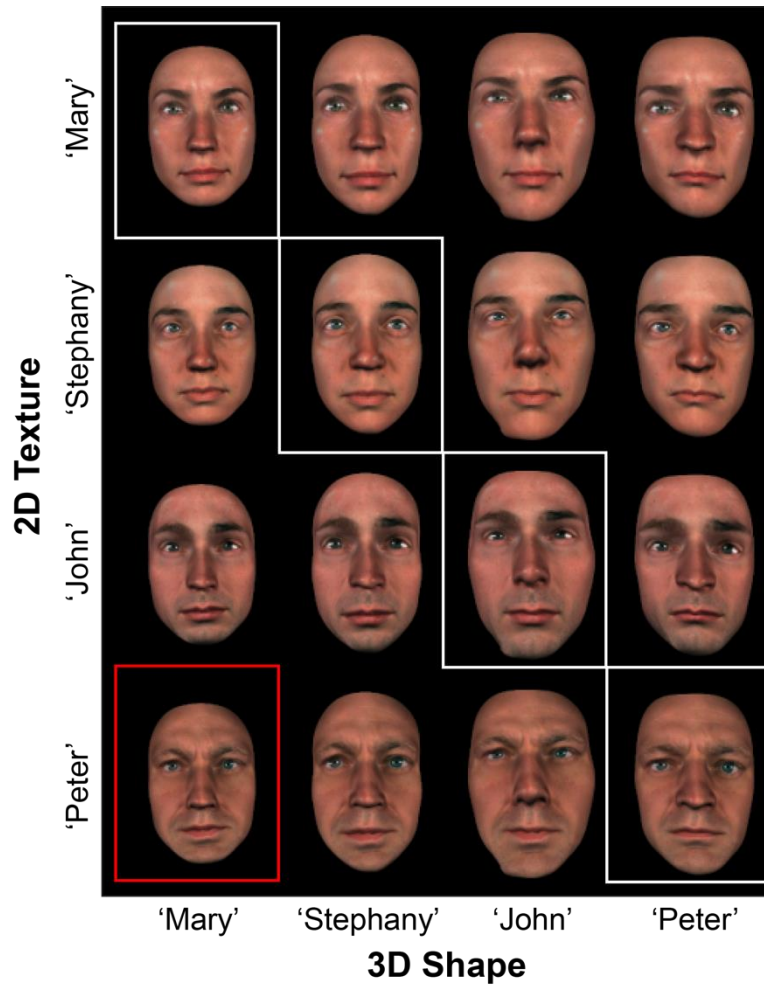

103

104 **Supplementary Figure 9.** Different 3D shapes (X axis) and different 2D textures (Y  
 105 axis) are combined to synthesize the 4 original target faces on the diagonal (white  
 106 framed). Off diagonal faces combine the X-axis shape of identity A with the Y-axis  
 107 texture of identity B. For example, the red framed identity combines the shape of  
 108 'Mary' with the texture of 'Peter.'

109 **Supplementary Table 1.** Identity familiarity ratings of 14 participants in the reverse  
 110 correlation experiment.

| <b>Participants</b> | <b>Mary</b> | <b>Stephany</b> | <b>John</b> | <b>Peter</b> |
|---------------------|-------------|-----------------|-------------|--------------|
| 1                   | 6           | 4               | 3           | 7            |
| 2                   | 7           | 8               | 9           | 6            |
| 3                   | 7           | 9               | 7           | 3            |
| 4                   | 8           | 8               | 7           | 8            |
| 5                   | 3           | 4               | 4           | 4            |
| 6                   | 3           | 3               | 4           | 5            |
| 7                   | 5           | 6               | 9           | 4            |
| 8                   | 5           | 6               | 9           | 5            |
| 9                   | 8           | 7               | 7           | 4            |
| 10                  | 8           | 6               | 8           | 10           |
| 11                  | 7           | 7               | 8           | 7            |
| 12                  | 7           | 6               | 6           | 7            |
| 13                  | 5           | 3               | 9           | 7            |
| 14                  | 9           | 9               | 9           | 9            |
| <b>Mean</b>         | 6.29        | 6.14            | 7.07        | 6.14         |
| <b>SD</b>           | 1.86        | 2.03            | 2.09        | 2.07         |

111 Note: Ratings are from 1 (not familiar at all) to 9 (highly familiar).

112 **Supplementary Table 2.** Identity familiarity ratings of 12 validators in the  
113 generalization experiment.

| Validators  | Mary | Stephany | John | Peter |
|-------------|------|----------|------|-------|
| 1           | 9    | 7        | 6    | 6     |
| 2           | 7    | 5        | 6    | 4     |
| 3           | 9    | 9        | 9    | 9     |
| 4           | 7    | 8        | 9    | 6     |
| 5           | 7    | 6        | 5    | 4     |
| 6           | 6    | 4        | 5    | 4     |
| 7           | 8    | 6        | 9    | 8     |
| 8           | 9    | 6        | 9    | 9     |
| 9           | 8    | 5        | 7    | 6     |
| 10          | 6    | 9        | 3    | 4     |
| 11          | 9    | 9        | 7    | 9     |
| 12          | 9    | 5        | 9    | 7     |
| <b>Mean</b> | 7.83 | 6.58     | 7    | 6.33  |
| <b>SD</b>   | 1.19 | 1.78     | 2.04 | 2.06  |

114 Note: Ratings are from 1 (not familiar at all) to 9 (highly familiar).

115



116 **Supplementary Table 3.** Linear mixed-effects model for 'Mary'.

| Estimation of Linear-mixed Effect Models |                 |       |                          |        | Statistics of Fixed Factors |            |            |                            |
|------------------------------------------|-----------------|-------|--------------------------|--------|-----------------------------|------------|------------|----------------------------|
| Fixed Factors                            | Estimated Slope | SE    | 95% Confidence Intervals |        | <i>F value</i>              | <i>DF1</i> | <i>DF2</i> | <i>p value (two-sided)</i> |
|                                          |                 |       | Lower                    | Upper  |                             |            |            |                            |
| Intercept                                | 0.146           | 0.021 | 0.104                    | 0.188  | 46.23                       | 1          | 564        | < 0.001                    |
| Face Type (Diag vs. Nondiag)             | 0.297           | 0.017 | 0.264                    | 0.33   | 315.49                      | 1          | 12,763     | < 0.001                    |
| Amplification                            | 0.321           | 0.025 | 0.272                    | 0.37   | 165.99                      | 1          | 46,502     | < 0.001                    |
| Task Type A (30 Deg Left vs. Front)      | -0.038          | 0.021 | -0.079                   | 0.002  |                             |            |            |                            |
| Task Type B (30 Deg Right vs. Front)     | 0.105           | 0.025 | 0.055                    | 0.155  | 7.8653                      | 4          | 20,386     | < 0.001                    |
| Task Type C (80 Years Old vs. Front)     | -0.098          | 0.022 | -0.142                   | -0.055 |                             |            |            |                            |
| Task Type D (Opposite Sex vs. Front)     | -0.107          | 0.037 | -0.18                    | -0.034 |                             |            |            |                            |

117 Note: Diag = diagnostic; Nondiag = nondiagnostic; Deg = degree.

118

119

120 **Supplementary Table 4.** Linear mixed-effects model for 'Stephany'.

| Estimation of Linear-mixed Effect Models |                 |       |                          |        | Statistics of Fixed Factors |            |            |                            |
|------------------------------------------|-----------------|-------|--------------------------|--------|-----------------------------|------------|------------|----------------------------|
| Fixed Factors                            | Estimated Slope | SE    | 95% Confidence Intervals |        | <i>F value</i>              | <i>DF1</i> | <i>DF2</i> | <i>p value (two-sided)</i> |
|                                          |                 |       | Lower                    | Upper  |                             |            |            |                            |
| Intercept                                | 0.343           | 0.023 | 0.299                    | 0.388  | 231.72                      | 1          | 552        | < 0.001                    |
| Face Type (Diag vs. Nondiag)             | 0.058           | 0.012 | 0.035                    | 0.081  | 25.068                      | 1          | 20.624     | < 0.001                    |
| Amplification                            | 0.156           | 0.052 | 0.054                    | 0.258  | 9.047                       | 1          | 15.714     | 0.008                      |
| Task Type A (30 Deg Left vs. Front)      | 0.139           | 0.051 | 0.039                    | 0.239  |                             |            |            |                            |
| Task Type B (30 Deg Right vs. Front)     | -0.069          | 0.042 | -0.152                   | 0.014  | 9.815                       | 4          | 14.734     | < 0.001                    |
| Task Type C (80 Years Old vs. Front)     | -0.083          | 0.029 | -0.139                   | -0.027 |                             |            |            |                            |
| Task Type D (Opposite Sex vs. Front)     | 0.067           | 0.046 | -0.024                   | 0.159  |                             |            |            |                            |

121 Note: Diag = diagnostic; Nondiag = nondiagnostic; Deg = degree.

122

123 **Supplementary Table 5.** Linear mixed-effects model for 'John'.

| Estimation of Linear-mixed Effect Models |                 |       |                          |        | Statistics of Fixed Factors |            |            |                            |
|------------------------------------------|-----------------|-------|--------------------------|--------|-----------------------------|------------|------------|----------------------------|
| Fixed Factors                            | Estimated Slope | SE    | 95% Confidence Intervals |        | <i>F value</i>              | <i>DF1</i> | <i>DF2</i> | <i>p value (two-sided)</i> |
|                                          |                 |       | Lower                    | Upper  |                             |            |            |                            |
| Intercept                                | 0.398           | 0.025 | 0.35                     | 0.447  | 261.9                       | 1          | 540        | < 0.001                    |
| Face Type (Diag vs. Nondiag)             | 0.143           | 0.031 | 0.083                    | 0.204  | 21.639                      | 1          | 12.004     | < 0.001                    |
| Amplification                            | 0.162           | 0.059 | 0.045                    | 0.278  | 7.385                       | 1          | 15.297     | 0.016                      |
| Task Type A (30 Deg Left vs. Front)      | 0.032           | 0.027 | -0.022                   | 0.085  |                             |            |            |                            |
| Task Type B (30 Deg Right vs. Front)     | -0.01           | 0.022 | -0.053                   | 0.033  | 1.591                       | 4          | 14.468     | 0.23                       |
| Task Type C (80 Years Old vs. Front)     | -0.062          | 0.028 | -0.117                   | -0.006 |                             |            |            |                            |
| Task Type D (Opposite Sex vs. Front)     | 0.007           | 0.033 | -0.058                   | 0.071  |                             |            |            |                            |

124 Note: Diag = diagnostic; Nondiag = nondiagnostic; Deg = degree.

125

126

127 **Supplementary Table 6.** Linear mixed-effects model for 'Peter'.

| Estimation of Linear-mixed Effect Models |                 |       |                          |       | Statistics of Fixed Factors |            |            |                            |
|------------------------------------------|-----------------|-------|--------------------------|-------|-----------------------------|------------|------------|----------------------------|
| Fixed Factors                            | Estimated Slope | SE    | 95% Confidence Intervals |       | <i>F value</i>              | <i>DF1</i> | <i>DF2</i> | <i>p value (two-sided)</i> |
|                                          |                 |       | Lower                    | Upper |                             |            |            |                            |
| Intercept                                | 0.251           | 0.023 | 0.206                    | 0.295 | 122.73                      | 1          | 564        | < 0.001                    |
| Face Type (Diag vs. Nondiag)             | 0.095           | 0.04  | 0.017                    | 0.173 | 5.76                        | 1          | 12.007     | 0.034                      |
| Amplification                            | 0.394           | 0.038 | 0.32                     | 0.469 | 107.72                      | 1          | 20.592     | 0.008                      |
| Task Type A (30 Deg Left vs. Front)      | -0.028          | 0.027 | -0.082                   | 0.025 |                             |            |            |                            |
| Task Type B (30 Deg Right vs. Front)     | -0.012          | 0.024 | -0.058                   | 0.035 | 2.696                       | 4          | 20.831     | 0.059                      |
| Task Type C (80 Years Old vs. Front)     | 0.047           | 0.029 | -0.011                   | 0.104 |                             |            |            |                            |
| Task Type D (Opposite Sex vs. Front)     | -0.047          | 0.037 | -0.119                   | 0.026 |                             |            |            |                            |

128 Note: Diag = diagnostic; Nondiag = nondiagnostic; Deg = degree.

129

130 **Supplementary Table 7.** Linear mixed-effects model with Face Type by Amplification Interaction.

| Estimation of Linear-mixed Effect Models |                 |       |                          |       | Statistics of Fixed Factors |     |        |                        |
|------------------------------------------|-----------------|-------|--------------------------|-------|-----------------------------|-----|--------|------------------------|
| Fixed Factors                            | Estimated Slope | SE    | 95% Confidence Intervals |       | F value                     | DF1 | DF2    | p value<br>(two-sided) |
|                                          |                 |       | Lower                    | Upper |                             |     |        |                        |
| Intercept                                | 0.285           | 0.015 | 0.256                    | 0.314 | 317.31                      | 1   | 2376   | < 0.001                |
| Face Type (Diag vs. Nondiag)             | 0.056           | 0.018 | 0.021                    | 0.091 | 9.721                       | 1   | 20.154 | 0.005                  |
| Amplification                            | 0.258           | 0.036 | 0.188                    | 0.328 | 52.341                      | 1   | 15.301 | < 0.001                |
| Face Type * Amplification                | 0.092           | 0.024 | 0.046                    | 0.138 | 15.318                      | 1   | 13     | 0.002                  |

131 Note: Diag = diagnostic; Nondiag = nondiagnostic; Deg = degree.

132

133

134
